## BOOK REVIEW AND NOTICES

*Manual of Medical Emergencies.* By STUART C. CULLEN, M.D., AND E. G. GROSS, M.D. Ed. 2. The Year Book Publishers, Inc., 1953.

The purpose of this compact book is to provide an accessible and comprehensive account of measures to be taken by practitioners in dealing with medical emergencies. Basic principles associated with immediate restorative measures are stressed, and the value of a working diagnosis in enabling life saving procedures to be instituted is emphasized.

Of particular interest to anesthesiologists is the chapter on Airway and Artificial Respiration. It provides a lucid account of present day practice in treating airway obstruction and anoxia from various causes. Chapters dealing with circulatory collapse, unconscious state, acute poisoning and drug reactions encompass most of the emergencies met in the practice of medicine.

In the main, treatment as advised by the authors conforms to sound standard practice. This manual of 264 pages, including a useful catalogue of drugs, serves the dual purpose of an excellent brief review of current medical practice and a handy reference guide in emergency situations.

JAMES M. McCORMICK, M.D.

This acknowledgment of receipt of the following books must be regarded as a sufficient return for the courtesy of the sender. A limited number of these books will be reviewed from time to time as space permits.

*Anoxia of The New-Born Infant.* A Symposium Organized by The Council for International Organizations of Medical Sciences. Edited by J. F. DELAFRESNAYE. 230 pages, illustrated. \$5.50. Springfield, Illinois, Charles C Thomas, 1954.

*Spinal Epidural Analgesia.* By P. R. BROMAGE. 123 pages, illustrated. \$3.75. Baltimore, Maryland, The William and Wilkins Company, 1954.

*Nerve Blocks.* A Manual of Regional Anesthesia for Practitioners of Medicine. By JOHN ADRIAN L. 253 pages, illustrated. \$6.50. Springfield, Illinois, Charles C Thomas, 1954.

*The Kidney.* A Ciba Foundation Symposium. Edited by A. A. G. LEWIS and G. E. W. WOLSTENHOME. 322 pages, 125 illustrations. \$6.75. Boston, Little, Brown and Company, 1954.

*Anesthesia in General Practice.* By STUART C. CULLEN. Ed. 4, 300 pages, illustrated. Chicago, Year Book Publishers, 1954.

*Compilation of Paintings on the Reproductive System.* Prepared by FRANK H. NETTER and edited by ERNST OPPENHEIMER. 270 pages. \$13.00. Commissioned and published by Ciba Pharmaceutical Products, Inc., Summit, New Jersey, 1954.

*Hypotension—Humoral and Neurogenic Factors.* A Ciba Foundation Symposium. Edited by G. E. W. WOLSTENHOME and MARGARET P. CAMERON. 285 pages, illustrated. \$6.75. Boston, Little, Brown and Company, 1954.
